# Supplementary material for: Curcumin Improves Neurogenesis in Alzheimer’s Disease Mice via the Upregulation of Wnt/β-Catenin and BDNF
Source: MDPI journal article supplement (doi:10.3390/ijms25105123), 2024-05-08
Supplement: s1 [file s1]

**Supplementary Table S1: Information of antibodies used in western blot.**

| Antibody                       | Company                        | Titer  |
|--------------------------------|--------------------------------|--------|
| anti-phospho- $\beta$ -catenin | Cell Signaling Technology, USA | 1:1000 |
| anti- $\beta$ -catenin         | Cell Signaling Technology, USA | 1:1000 |
| anti-phospho-GSK3 $\beta$      | Cell Signaling Technology, USA | 1:1000 |
| anti-GSK3 $\beta$              | Cell Signaling Technology, USA | 1:1000 |
| anti-phospho-CREB              | Cell Signaling Technology, USA | 1:1000 |
| anti-CREB                      | Abcam, USA                     | 1:1000 |
| anti-phospho-Akt               | Abcam, USA                     | 1:1000 |
| anti-Akt                       | Abcam, USA                     | 1:1000 |
| anti-GAPDH                     | Cell Signaling Technology, USA | 1:2000 |
| anti- $\beta$ -actin           | Cell Signaling Technology, USA | 1:2000 |
