# Supplementary material for: Curcumin Improves Neurogenesis in Alzheimer’s Disease Mice via the Upregulation of Wnt/β-Catenin and BDNF
Source: MDPI journal article supplement (doi:10.3390/ijms25105123), 2024-05-08
Supplement: s1 [file s1]

**Supplementary Table S2: Information of antibodies used in immunostaining.**

| <b>Antibody</b>                                         | <b>Company</b>                 | <b>Titer</b> |
|---------------------------------------------------------|--------------------------------|--------------|
| Rat monoclonal anti-BrdU antibody                       | Abcam, UK                      | 1:200        |
| Alexa Fluor 594 AffiniPure Donkey Anti-Rat IgG (H+L)    | Yeasen, China                  | 1:100        |
| CY3-labeled anti-rat IgG antibody                       | Millipore, USA                 | 1:200        |
| Rabbit monoclonal anti-Neun antibody                    | Cell Signaling Technology, USA | 1:200        |
| rabbit polyclonal anti-DCX Antibody                     | Cell Signaling Technology, USA | 1:100        |
| Alexa Fluor 488 AffiniPure Donkey Anti-Rabbit IgG (H+L) | Yeasen, China                  | 1:100        |
